# Supplementary material for: Quantitative approaches to variant classification increase the yield and precision of genetic testing in Mendelian diseases: the case of hypertrophic cardiomyopathy
Source: Genome Med. 2019 Jan 29;11:5. doi: 10.1186/s13073-019-0616-z (PMC6350371; doi:10.1186/s13073-019-0616-z)
Supplement: Supplementary file 1 — Supplementary tables S1-S7. (XLSX 38 kb) [file 13073_2019_616_MOESM1_ESM.xlsx]

## Sheet: Table S1
Gene	Vartype	ExAC MAF threshold	Freq Cases (variants/total)	Freq ExAC (variants/total)	p-value	OR	EF
MYH7	Non-Truncating	4e-05	13.89% (849/6112)	1.11% (672/60469)	<0.0001	14.4 (12.9-15.9)	0.930 (0.923-0.938)
MYH7	Non-Truncating	0.0001	14.04% (858/6112)	1.23% (742/60469)	<0.0001	13.1 (11.9-14.6)	0.924 (0.916-0.932)
MYH7	Non-Truncating	0.0005	14.46% (884/6112)	1.33% (807/60469)	<0.0001	12.5 (11.3-13.8)	0.920 (0.912-0.928)
MYH7	Non-Truncating	0.001	14.59% (892/6112)	1.35% (816/60469)	<0.0001	12.5 (11.3-13.8)	0.920 (0.912-0.928)
MYBPC3	Non-Truncating	4e-05	9.35% (578/6179)	1.21% (555/45794)	<0.0001	8.4 (7.5-9.5)	0.881 (0.868-0.895)
MYBPC3	Non-Truncating	0.0001	9.76% (603/6179)	1.62% (742/45794)	<0.0001	6.6 (5.9-7.3)	0.848 (0.832-0.863)
MYBPC3	Non-Truncating	0.0005	10.75% (664/6179)	1.88% (862/45794)	<0.0001	6.3 (5.7-7.0)	0.841 (0.825-0.856)
MYBPC3	Non-Truncating	0.001	10.96% (677/6179)	1.94% (889/45794)	<0.0001	6.2 (5.6-6.9)	0.839 (0.823-0.855)
TNNT2	Non-Truncating	4e-05	1.69% (103/6103)	0.15% (86/57018)	<0.0001	11.4 (8.5-15.2)	0.912 (0.889-0.935)
TNNT2	Non-Truncating	0.0001	1.70% (104/6103)	0.17% (98/57018)	<0.0001	10.1 (7.6-13.3)	0.901 (0.875-0.926)
TNNT2	Non-Truncating	0.0005	2.11% (129/6103)	0.21% (121/57018)	<0.0001	10.2 (7.9-13.0)	0.902 (0.879-0.924)
TNNT2	Non-Truncating	0.001	2.11% (129/6103)	0.21% (121/57018)	<0.0001	10.2 (7.9-13.0)	0.902 (0.879-0.924)
TNNI3	Non-Truncating	4e-05	2.10% (127/6047)	0.15% (79/52607)	<0.0001	14.3 (10.8-18.9)	0.930 (0.912-0.948)
TNNI3	Non-Truncating	0.0001	2.10% (127/6047)	0.17% (90/52607)	<0.0001	12.5 (9.5-16.4)	0.920 (0.900-0.940)
TNNI3	Non-Truncating	0.0005	2.13% (129/6047)	0.19% (101/52607)	<0.0001	11.3 (8.7-14.7)	0.912 (0.891-0.933)
TNNI3	Non-Truncating	0.001	2.13% (129/6047)	0.19% (101/52607)	<0.0001	11.3 (8.7-14.7)	0.912 (0.891-0.933)
TPM1	Non-Truncating	4e-05	1.44% (64/4447)	0.07% (42/58642)	<0.0001	20.4 (13.8-30.1)	0.951 (0.933-0.969)
TPM1	Non-Truncating	0.0001	1.44% (64/4447)	0.08% (44/58642)	<0.0001	19.4 (13.2-28.6)	0.949 (0.930-0.967)
TPM1	Non-Truncating	0.0005	1.48% (66/4447)	0.08% (49/58642)	<0.0001	18.0 (12.4-26.1)	0.944 (0.925-0.964)
TPM1	Non-Truncating	0.001	1.48% (66/4447)	0.08% (49/58642)	<0.0001	18.0 (12.4-26.1)	0.944 (0.925-0.964)
MYL2	Non-Truncating	4e-05	1.03% (43/4185)	0.11% (69/60521)	<0.0001	9.1 (6.2-13.3)	0.890 (0.851-0.930)
MYL2	Non-Truncating	0.0001	1.03% (43/4185)	0.14% (82/60521)	<0.0001	7.7 (5.3-11.1)	0.869 (0.824-0.915)
MYL2	Non-Truncating	0.0005	1.36% (57/4185)	0.15% (93/60521)	<0.0001	9.0 (6.4-12.5)	0.889 (0.854-0.923)
MYL2	Non-Truncating	0.001	1.36% (57/4185)	0.15% (93/60521)	<0.0001	9.0 (6.4-12.5)	0.889 (0.854-0.923)
MYL3	Non-Truncating	4e-05	0.84% (35/4185)	0.14% (85/60605)	<0.0001	6.0 (4.0-8.9)	0.833 (0.772-0.895)
MYL3	Non-Truncating	0.0001	0.84% (35/4185)	0.14% (85/60605)	<0.0001	6.0 (4.0-8.9)	0.833 (0.772-0.895)
MYL3	Non-Truncating	0.0005	0.96% (40/4185)	0.18% (108/60605)	<0.0001	5.4 (3.8-7.8)	0.815 (0.752-0.878)
MYL3	Non-Truncating	0.001	0.96% (40/4185)	0.18% (108/60605)	<0.0001	5.4 (3.8-7.8)	0.815 (0.752-0.878)
ACTC1	Non-Truncating	4e-05	0.53% (22/4185)	0.06% (37/60198)	<0.0001	8.6 (5.1-14.6)	0.884 (0.826-0.941)
ACTC1	Non-Truncating	0.0001	0.53% (22/4185)	0.06% (37/60198)	<0.0001	8.6 (5.1-14.6)	0.884 (0.826-0.941)
ACTC1	Non-Truncating	0.0005	0.53% (22/4185)	0.06% (37/60198)	<0.0001	8.6 (5.1-14.6)	0.884 (0.826-0.941)
ACTC1	Non-Truncating	0.001	0.53% (22/4185)	0.06% (37/60198)	<0.0001	8.6 (5.1-14.6)	0.884 (0.826-0.941)
PLN	Non-Truncating	4e-05	0.17% (9/5440)	0.02% (15/60475)	<0.0001	6.7 (2.9-15.3)	0.850 (0.737-0.964)
PLN	Non-Truncating	0.0001	0.17% (9/5440)	0.04% (25/60475)	0.0014	4.0 (1.9-8.6)	0.750 (0.576-0.925)
PLN	Non-Truncating	0.0005	0.17% (9/5440)	0.04% (25/60475)	0.0014	4.0 (1.9-8.6)	0.750 (0.576-0.925)
PLN	Non-Truncating	0.001	0.17% (9/5440)	0.04% (25/60475)	0.0014	4.0 (1.9-8.6)	0.750 (0.576-0.925)
CSRP3	Non-Truncating	4e-05	0.62% (30/4866)	0.19% (115/60647)	<0.0001	3.3 (2.2-4.9)	0.694 (0.579-0.808)
CSRP3	Non-Truncating	0.0001	0.74% (36/4866)	0.26% (158/60647)	<0.0001	2.9 (2.0-4.1)	0.650 (0.532-0.768)
CSRP3	Non-Truncating	0.0005	0.74% (36/4866)	0.29% (175/60647)	<0.0001	2.6 (1.8-3.7)	0.612 (0.482-0.741)
CSRP3	Non-Truncating	0.001	0.74% (36/4866)	0.29% (175/60647)	<0.0001	2.6 (1.8-3.7)	0.612 (0.482-0.741)
FHL1	Non-Truncating	4e-05	0.78% (16/2061)	0.09% (53/60278)	<0.0001	8.9 (5.1-15.6)	0.888 (0.826-0.949)
FHL1	Non-Truncating	0.0001	0.78% (16/2061)	0.10% (63/60278)	<0.0001	7.5 (4.3-13.0)	0.866 (0.795-0.938)
FHL1	Non-Truncating	0.0005	0.78% (16/2061)	0.12% (74/60278)	<0.0001	6.4 (3.7-10.9)	0.843 (0.760-0.925)
FHL1	Non-Truncating	0.001	0.78% (16/2061)	0.12% (74/60278)	<0.0001	6.4 (3.7-10.9)	0.843 (0.760-0.925)
TNNC1	Non-Truncating	4e-05	0.24% (8/3335)	0.06% (33/59192)	0.0013	4.3 (2.0-9.3)	0.768 (0.598-0.938)
TNNC1	Non-Truncating	0.0001	0.24% (8/3335)	0.06% (33/59192)	0.0013	4.3 (2.0-9.3)	0.768 (0.598-0.938)
TNNC1	Non-Truncating	0.0005	0.24% (8/3335)	0.06% (33/59192)	0.0013	4.3 (2.0-9.3)	0.768 (0.598-0.938)
TNNC1	Non-Truncating	0.001	0.24% (8/3335)	0.06% (33/59192)	0.0013	4.3 (2.0-9.3)	0.768 (0.598-0.938)
Table S1: Etiological fractions and odds ratios for non-truncating variants in established HCM genes, with sensitivity analysis to show the effect of different ExAC minor allele frequency thresholds to define variant rarity - 0.00004 (as used in this study, see Methods) and 0.0001, 0.0005 and 0.001.

## Sheet: Table S2
Predictor	MYBPC3	MYH7	TNNT2	TNNI3	TPM1	MYL2	MYL3	ACTC1
No. of variants (Path / Benign)	45 / 165	176 / 102	18 / 21	26 / 15	14 / 7	10 / 18	5 / 15	4 / 6
CADD	0.93 / 0.21	1.00 / 0.14	0.94 / 0.24	0.96 / 0.20	1.00 / 0.14	1.00 / 0.17	1.00 / 0.20	1.00 / 0.17
FATHMM	0.18 / 0.97	0.91 / 0.24	0.78 / 0.05	1.00 / 0.07	0.93 / 0.43	0.20 / 0.89	0.40 / 0.07	1.00 / 0.00
fMKL	0.91 / 0.21	0.93 / 0.20	0.94 / 0.43	0.88 / 0.33	1.00 / 0.00	1.00 / 0.11	1.00 / 0.20	1.00 / 0.00
LRT	- / -	- / -	0.94 / 0.62	0.73 / 0.67	0.93 / 0.00	0.90 / 0.17	0.80 / 0.60	0.00 / 0.00
Mutation Assessor	0.76 / 0.52	0.80 / 0.27	- / -	0.73 / 0.60	- / -	0.70 / 0.56	0.80 / 0.33	1.00 / 0.67
MutationTaster	0.89 / 0.28	0.97 / 0.13	0.94 / 0.33	0.92 / 0.47	1.00 / 0.00	1.00 / 0.06	1.00 / 0.20	1.00 / 0.00
Polyphen2-HDIV	0.84 / 0.39	0.84 / 0.36	0.94 / 0.38	0.96 / 0.40	0.50 / 0.57	1.00 / 0.33	0.60 / 0.33	0.25 / 0.83
PROVEAN	0.71 / 0.55	0.88 / 0.41	0.83 / 0.67	0.85 / 0.60	0.79 / 0.71	0.90 / 0.56	0.80 / 0.53	0.50 / 0.67
SIFT	0.80 / 0.38	0.95 / 0.22	0.83 / 0.67	0.88 / 0.67	0.86 / 0.43	0.70 / 0.56	0.80 / 0.27	- / -
Consensus	0.89 / 0.35	0.98 / 0.22	0.94 / 0.48	0.96 / 0.33	0.93 / 0.29	1.00 / 0.22	1.00 / 0.40	1.00 / 0.17
MetaSVM	0.44 / 0.84	0.99 / 0.28	0.83 / 0.19	0.92 / 0.20	1.00 / 0.29	0.70 / 0.56	0.40 / 0.47	1.00 / 0.17
MetaLR	0.36 / 0.87	1.00 / 0.24	0.83 / 0.14	0.96 / 0.13	1.00 / 0.29	0.80 / 0.61	0.60 / 0.33	1.00 / 0.00
Table S2: True positive rate (TPR) and true negative rate (TNR) values for missense functional prediction scores for eight core sarcomeric HCM genes, based on defined pathogenic and benign variants as described in Supplemental Methods. Consensus indicates >50% of individual predictors with a deleterious score. Notably for MYBPC3 and MYL2, the TPR of the FATHMM predictor (and therefore the MetaLR …

## Sheet: Table S3
Gene	Total	CADD	FATHMM	fMKL	LRT	MA	MT	PP2-HDIV	PROVEAN	SIFT	MetaLR	MetaSVM
ACTC1	2680	1	0.934	1	0.975	0.931	1	0.934	0.934	0	0.934	0.934
CSRP3	1424	1	0.898	1	0.955	0.891	1	0.898	0.898	0.898	0.898	0.898
FHL1	2090	1	0.911	1	0.808	0.198	0.859	0.911	0.911	0.911	0.911	0.911
FLNC	19105	1	0.931	1	0.97	0.93	0.994	0.931	0.931	0.931	0.931	0.931
MYBPC3	9141	1	0.911	1	0	0.907	0.996	0.908	0.911	0.911	0.911	0.911
MYH7	14063	1	0.914	1	0	0.912	1	0.914	0.914	0.914	0.914	0.914
MYL2	1265	1	0.898	1	0.937	0.891	0.998	0.898	0.898	0.898	0.898	0.898
MYL3	1439	1	0.91	1	0.953	0.904	0.996	0.91	0.91	0.91	0.91	0.91
PLN	372	1	0.917	1	0.979	0	0.949	0.917	0.917	0.917	0.917	0.917
TNNC1	1237	1	0.905	1	0.945	0.897	1	0.905	0.905	0.905	0.905	0.905
TNNI3	1534	1	0.89	1	0.94	0.884	0.98	0.89	0.89	0.89	0.89	0.89
TNNT2	2255	1	0.861	1	0.912	0.004	0.934	0.852	0.861	0.861	0.861	0.861
TPM1	2144	1	0.88	1	0.856	0.003	0.889	0.88	0.88	0.88	0.88	0.88
Table S3: Proportion of predictions available for all possible missense variants in HCM genes for 11 functional prediction algorithms and 2 consensus algorithms. Gene : predictor combinations for which less than 20% of predictions are available in dbNSFP (version 3.2) are shaded in red - LRT (MYH7 and MYBPC3), Mutation assessor (FHL1, PLN, TPM1 and TNNT2) and SIFT (ACTC1). For all other predictor…

## Sheet: Table S4
Gene	Window size	HCM		ExAC
		Residues	p-value	Residues	p-value
MYH7	0.326	167-931	2.3e-21	1244-1929	9.1e-08
MYBPC3	0.015	485-502	0.00036	32-56	0.0012
		1248-1266	0.00053	817-848	0.00033
				1033-1051	0.00081
TNNT2	0.326	79-179	1.6e-06	-	-
TNNI3	0.175	141-209	7.3e-12	-	-
MYL3	0.35	143-180	7.4e-06	-	-
CSRP3	0.25	44-71	2.7e-05	-	-
FLNC	0.383	-	-	334-1611	5e-07
TNNC1	0.255	-	-	106-158	7.7e-05
Table S4: Details of clusters of rare non-truncating variants (missense and single residue inframe indels) detected in HCM case cohorts and ExAC population reference data. Displayed are the optimal size of the sliding window selected by the algorithm to detect clusters in each gene, the amino acid residues denoting significantly enriched variant clusters and associated p-values. No clusters were …

## Sheet: Table S5
Gene	Case Excess	EF (whole gene)	Predictor method	Pathogenic Prediction		Non-Pathogenic Prediction
				Case freq.	EF	Case freq.	EF
TPM1	0.0137	0.951 (0.933-0.969)	Consensus	0.0139	0.955 (0.938-0.973)	0.05% (p=0.0823)	0.810 (0.522-1.099)
			MetaSVM	0.0137	0.957 (0.940-0.974)	0.07% (p=0.0289)	0.823 (0.601-1.046)
			MetaLR	0.0137	0.957 (0.940-0.974)	0.07% (p=0.0289)	0.823 (0.601-1.046)
MYL2	0.0092	0.890 (0.851-0.930)	Consensus	0.0096	0.907 (0.872-0.943)	0.07% (p=0.3019)	0.481 (-0.234-1.197)
			MetaSVM	0.0045	0.891 (0.833-0.950)	0.0058	0.883 (0.827-0.940)
			MetaLR	0.0055	0.916 (0.873-0.960)	0.0048	0.851 (0.775-0.927)
ACTC1	0.0047	0.884 (0.826-0.941)	Consensus	0.005	0.885 (0.826-0.943)	0.03% (p=0.1826)	0.861 (0.549-1.173)
			MetaSVM	0.0053	0.890 (0.835-0.945)	0.00% (p=1.0000)	0.652 (-0.335-1.639)
			MetaLR	0.0053	0.884 (0.826-0.941)	0.00% (p=1.0000)	0.930 (0.676-1.185)
Table S5: The performance of consensus functional prediction scores in differentiating EF values for non-truncating/missense variants in 3 sarcomeric HCM genes where the no clustering of case variants was detected. Fisher’s exact p-values for comparison of rare variation in cases and ExAC reference samples were <0.0001 unless otherwise noted. Note – for MYL2, the FATHMM predictor was not included…

## Sheet: Table S6
Gene	Variant	Protein	Variant Type	ExAC FAF	Classification	ACMG/AMP rules activated	Cases	Source for curated evidence
ACTC1	c.76G>A	p.D26N	missense	0	VUS	PM2,PP3,PM1(p)	1
ACTC1	c.787C>G	p.L263V	missense	0	VUS	PM2,PM1(p)	1
ACTC1	c.850A>T	p.I284F	missense	0	VUS	PM2,PM1(p)	2
CRYAB	c.295G>T	p.E99X	nonsense	0	Likely Pathogenic	PM2,PVS1	1
CSRP3	c.131T>C	p.L44P	missense	0	Likely Pathogenic	PM2,PS4,PP3,PM1(p)	2
CSRP3	c.449G>A	p.C150Y	missense	0	Likely Pathogenic	PM2,PS4,PP3	1
FHL1	c.142G>A	p.G48S	missense	0	VUS	PM2,PM1(p)	1
FHL1	c.764G>A	p.C255Y	missense	0	VUS	PM2,PP3,PM1(p)	1
MYBPC3	c.1084A>C	p.S362R	missense	0	VUS	PM2,PM1(p)	1
MYBPC3	c.1120C>T	p.Q374X	nonsense	0	Likely Pathogenic	PM2,PVS1	1
MYBPC3	c.1201C>T	p.Q401X	nonsense	0	Likely Pathogenic	PM2,PVS1	1
MYBPC3	c.1217G>A	p.S406N	missense	0	VUS	PM2,PP3,PM1(p)	1
MYBPC3	c.1218C>A	p.S406R	missense	0	VUS	PM2,PM1(p)	1
MYBPC3	c.1227-2A>G	-	essential splice site	0	Likely Pathogenic	PM2,PVS1	1
MYBPC3	c.126G>A	p.W42X	nonsense	0	Likely Pathogenic	PM2,PVS1	1
MYBPC3	c.1351+1G>A	-	essential splice site	0	Likely Pathogenic	PM2,PVS1	1
MYBPC3	c.1357_1358delCC	-	frameshift	0	Pathogenic	PM2,PVS1,PP1(s)	1	PMID:12788380
MYBPC3	c.1359delT	-	frameshift	0	Likely Pathogenic	PM2,PVS1	1
MYBPC3	c.1405C>T	p.Q469X	nonsense	0	Likely Pathogenic	PM2,PVS1	1
MYBPC3	c.1408C>T	p.R470W	missense	0	VUS	PM2,PP3,PM1(p)	1
MYBPC3	c.1457+5G>C	-	splice site	0	VUS	PM2	1
MYBPC3	c.1471G>A	p.V491M	missense	3.9e-05	Likely Pathogenic *	PM2,PP3,PM1(s)	1
MYBPC3	c.1483C>G	p.R495G	missense	0	Pathogenic	PM2,PS4,PP3,PM5,PM1(s)	4
MYBPC3	c.1484G>A	p.R495Q	missense	0	Pathogenic	PM2,PS4,PP1(p),PM1(s)	1	PMID:9562578
MYBPC3	c.1503C>G	p.Y501X	nonsense	0	Likely Pathogenic	PM2,PVS1	1
MYBPC3	c.1504C>T	p.R502W	missense	5e-06	Pathogenic	PM2,PS4,PP1(s),PP3,PM5,PM1(s)	12	PMID:20378854
MYBPC3	c.1505G>A	p.R502Q	missense	0	Pathogenic	PM2,PS4,PP1(m),PP3,PM5,PM1(s)	1	PMID:9562578
MYBPC3	c.1518C>A	p.D506E	missense	0	VUS	PM2,PM1(p)	1
MYBPC3	c.1624+4A>T	-	splice site	0	Likely Pathogenic	PM2,PS4	3
MYBPC3	c.1624G>C	p.E542Q	missense	0	Likely Pathogenic	PM2,PS4,PP1(p),PM1(p)	4	ClinVar:SCV000256661.2.
MYBPC3	c.1765C>T	p.R589C	missense	0	VUS	PM2,PP3,PM1(p)	2
MYBPC3	c.1778C>T	p.S593F	missense	0	VUS	PM2,PM1(p)	1
MYBPC3	c.1828G>A	p.D610N	missense	0	VUS	PM2,PM1(p)	1
MYBPC3	c.1871A>G	p.N624S	missense	3.7e-05	VUS	PM2,PM1(p)	1
MYBPC3	c.188G>A	p.R63Q	missense	0	VUS	PM2,PM1(p)	1
MYBPC3	c.1928-2A>G	-	essential splice site	0	Pathogenic	PM2,PVS1,PS4,PP1(s)	1	PMID:7493026
MYBPC3	c.1955C>G	p.P652R	missense	0	VUS	PM2,PM1(p)	1
MYBPC3	c.2011G>A	p.V671I	missense	0	VUS	PM2,PM1(p)	1
MYBPC3	c.2030C>T	p.P677L	missense	0	VUS	PM2,PM1(p)	1
MYBPC3	c.2198G>A	p.R733H	missense	2e-05	VUS	PM2,PM1(p)	1
MYBPC3	c.2267delC	-	frameshift	0	Likely Pathogenic	PM2,PVS1	1
MYBPC3	c.2308G>A	p.D770N	missense	0	Likely Pathogenic	PM2,PS4,PP3,PM1(p)	2
MYBPC3	c.2371C>T	p.Q791X	nonsense	0	Likely Pathogenic	PM2,PVS1	1
MYBPC3	c.2373dupG	-	frameshift	0	Likely Pathogenic	PM2,PVS1	2
MYBPC3	c.2376G>A	p.W792X	nonsense	0	Likely Pathogenic	PM2,PVS1	1
MYBPC3	c.2429G>A	p.R810H	missense	2e-05	Likely Pathogenic	PM2,PS4,PP3,PM1(p)	3
MYBPC3	c.2459G>A	p.R820Q	missense	0	VUS	PM2,PP1(p),PP3,PM1(p)	2	PMID:12628722
MYBPC3	c.2543_2544delCG	-	frameshift	0	Likely Pathogenic	PM2,PVS1	1
MYBPC3	c.2545delG	-	frameshift	0	Likely Pathogenic	PM2,PVS1	1
MYBPC3	c.2558delG	-	frameshift	0	Likely Pathogenic	PM2,PVS1	1
MYBPC3	c.2690_2696delGAGCAGG	-	frameshift	0	Likely Pathogenic	PM2,PVS1	1
MYBPC3	c.2737+2_2737+3delTG	-	essential splice site	0	Likely Pathogenic	PM2,PVS1	1
MYBPC3	c.2827C>T	p.R943X	nonsense	0	Pathogenic	PM2,PVS1,PS4	1
MYBPC3	c.2860G>A	p.A954T	missense	0	VUS	PM2,PM1(p)	1
MYBPC3	c.2864_2865delCT	-	frameshift	0	Pathogenic	PM2,PVS1,PS4,PP1(s)	1	PMID:9562578
MYBPC3	c.2905+1G>A	-	essential splice site	0	Pathogenic	PM2,PVS1,PS4	1
MYBPC3	c.2905+2T>G	-	essential splice site	0	Likely Pathogenic	PM2,PVS1	1
MYBPC3	c.2905C>T	p.Q969X	nonsense	0	Pathogenic	PM2,PVS1,PP1(s)	1	PMID:9541104
MYBPC3	c.3064C>T	p.R1022C	missense	0	VUS	PM2,PP3,PM1(p)	1
MYBPC3	c.3163A>T	p.K1055X	nonsense	0	Likely Pathogenic	PM2,PVS1	1
MYBPC3	c.3190+1G>A	-	essential splice site	0	Likely Pathogenic	PM2,PVS1	1
MYBPC3	c.3190+5G>A	-	splice site	5e-06	Likely Pathogenic	PM2,PS4	1
MYBPC3	c.3226_3227insT	-	frameshift	0	Pathogenic	PM2,PVS1,PS4	2
MYBPC3	c.3233G>A	p.W1078X	nonsense	0	Likely Pathogenic	PM2,PVS1	1
MYBPC3	c.3257G>A	p.W1086X	nonsense	0	Likely Pathogenic	PM2,PVS1	1
MYBPC3	c.327_332delCCCTGC	-	inframe	0	VUS	PM2,PM4,PM1(p)	1
MYBPC3	c.3286G>T	p.E1096X	nonsense	0	Likely Pathogenic	PM2,PVS1	1
MYBPC3	c.3408C>A	p.Y1136X	nonsense	0	Likely Pathogenic	PM2,PVS1	1
MYBPC3	c.3491-3C>G	-	splice site	0	VUS	PM2	1
MYBPC3	c.3492delC	-	frameshift	0	Likely Pathogenic	PM2,PVS1	1
MYBPC3	c.3613C>T	p.R1205W	missense	0	Likely Pathogenic	PM2,PS4,PM1(p)	1
MYBPC3	c.3627+1G>A	-	essential splice site	0	Pathogenic	PM2,PVS1,PS4,PP1(s)	1	PMID:9562578
MYBPC3	c.3697C>T	p.Q1233X	nonsense	0	Pathogenic	PM2,PVS1,PS4,PP1(p)	1	PMID:18957093
MYBPC3	c.3742G>A	p.G1248R	missense	2e-05	Likely Pathogenic *	PM2,PM1(s)	1
MYBPC3	c.3763G>C	p.A1255P	missense	0	Likely Pathogenic *	PM2,PP3,PM1(s)	1
MYBPC3	c.3771C>A	p.N1257K	missense	0	Pathogenic	PM2,PS4,PP3,PM1(s)	1
MYBPC3	c.442G>A	p.G148R	missense	0	VUS	PM2,PM1(p)	2
MYBPC3	c.451G>A	p.D151N	missense	0	VUS	PM2,PM1(p)	1
MYBPC3	c.484C>T	p.Q162X	nonsense	0	Likely Pathogenic	PM2,PVS1	1
MYBPC3	c.655G>C	p.V219L	missense	0	Likely Pathogenic	PM2,PS4,PP3,PM1(p)	2
MYBPC3	c.710A>C	p.Y237S	missense	0	Pathogenic	PM2,PS4,PP1(m),PP3,PM1(p)	1	ClinVar:SCV000059314.4
MYBPC3	c.767T>G	p.V256G	missense	0	VUS	PM2,PP3,PM1(p)	1
MYBPC3	c.772G>A	p.E258K	missense	1.8e-05	Likely Pathogenic	PM2,PS4,PP1(p),PM1(p)	2	PMID:9562578
MYBPC3	c.806C>A	p.S269X	nonsense	0	Likely Pathogenic	PM2,PVS1	1
MYBPC3	c.821+2T>C	-	essential splice site	0	Likely Pathogenic	PM2,PVS1	1
MYH7	c.1060G>A	p.G354S	missense	0	Likely Pathogenic *	PM2,PP3,PM1(s)	1
MYH7	c.1063G>A	p.A355T	missense	0	Pathogenic	PM2,PS4,PP3,PM1(s)	4
MYH7	c.1075T>G	p.F359V	missense	0	Likely Pathogenic *	PM2,PM1(s)	1
MYH7	c.1357C>T	p.R453C	missense	0	Pathogenic	PM2,PS4,PP1(s),PP3,PM1(s)	2	PMID:1552912
MYH7	c.1358G>A	p.R453H	missense	0	Likely Pathogenic *	PM2,PP3,PM5,PM1(s)	1
MYH7	c.1405G>A	p.D469N	missense	0	Likely Pathogenic *	PM2,PP3,PM1(s)	1
MYH7	c.1447G>A	p.E483K	missense	0	Likely Pathogenic *	PM2,PP1(p),PP3,PM1(s)	1	PMID:10424815
MYH7	c.1464C>A	p.F488L	missense	0	Likely Pathogenic *	PM2,PM1(s)	1
MYH7	c.1477A>T	p.M493L	missense	0	Likely Pathogenic *	PM2,PP3,PM1(s)	1
MYH7	c.1753A>T	p.I585F	missense	0	Likely Pathogenic *	PM2,PM1(s)	1
MYH7	c.1988G>A	p.R663H	missense	5e-06	Pathogenic	PM2,PS4,PP1(s),PP3,PM1(s)	3	PMID:10750581
MYH7	c.2011C>T	p.R671C	missense	0	Likely Pathogenic *	PM2,PP3,PM1(s)	1
MYH7	c.2146G>A	p.G716R	missense	0	Pathogenic	PM2,PS4,PP1(m),PS2,PP3,PM1(s)	1	PMID:18953637
MYH7	c.2167C>T	p.R723C	missense	5e-06	Pathogenic	PM2,PS4,PP1(m),PS2,PP3,PM5,PM1(s)	1	PMID:1430197
MYH7	c.2221G>T	p.G741W	missense	0	Pathogenic	PM2,PS4,PP1(p),PP3,PM1(s)	1	PMID:8533830
MYH7	c.2242T>A	p.S748T	missense	0	Likely Pathogenic *	PM2,PP3,PM1(s)	1
MYH7	c.2243C>T	p.S748F	missense	0	Likely Pathogenic *	PM2,PP3,PM1(s)	1
MYH7	c.2296A>C	p.K766Q	missense	0	Likely Pathogenic *	PM2,PP3,PM1(s)	1
MYH7	c.2302G>A	p.G768R	missense	0	Pathogenic	PM2,PS4,PP3,PM1(s)	2
MYH7	c.2389G>A	p.A797T	missense	3.4e-05	Pathogenic	PM2,PS4,PP1(s),PM1(s)	3	PMID:11186938
MYH7	c.2539A>G	p.K847E	missense	0	Pathogenic	PM2,PS4,PM1(s)	5
MYH7	c.2555T>C	p.M852T	missense	0	Likely Pathogenic *	PM2,PP3,PM1(s)	1
MYH7	c.2606G>A	p.R869H	missense	3.4e-05	Likely Pathogenic *	PM2,PP3,PM1(s)	1
MYH7	c.2606G>C	p.R869P	missense	0	Likely Pathogenic *	PM2,PP3,PM1(s)	1
MYH7	c.2609G>A	p.R870H	missense	0	Pathogenic	PM2,PS4,PP1(s),PP3,PM1(s)	1	PMID:16650083
MYH7	c.2717A>G	p.D906G	missense	0	Pathogenic	PM2,PS4,PP1(s),PP3,PM1(s)	5	PMID:12081993
MYH7	c.2722C>G	p.L908V	missense	0	Pathogenic	PM2,PS4,PP1(s),PP3,PM1(s)	1	PMID:1638703
MYH7	c.2770G>A	p.E924K	missense	0	Pathogenic	PM2,PS4,PS2,PP3,PM1(s)	1	PMID:1430197
MYH7	c.2782G>A	p.D928N	missense	0	Likely Pathogenic *	PM2,PP1(p),PP3,PM1(s)	1	ClinVar:SCV000208509.10
MYH7	c.3134G>T	p.R1045L	missense	5e-06	VUS	PM2,PP3	2
MYH7	c.4066G>A	p.E1356K	missense	0	Likely Pathogenic	PM2,PS4,PP3	1
MYH7	c.4124A>G	p.Y1375C	missense	0	VUS	PM2,PP3	1
MYH7	c.4135G>A	p.A1379T	missense	0	Pathogenic	PM2,PS4,PP1(s)	1	PMID:11861413
MYH7	c.4258C>T	p.R1420W	missense	0	VUS	PM2,PP3	1
MYH7	c.4259G>A	p.R1420Q	missense	0	VUS	PM2,PP3	1
MYH7	c.428G>A	p.R143Q	missense	0	Likely Pathogenic	PM2,PS4,PP3	1
MYH7	c.4317_4319dupTGC	-	inframe	0	VUS	PM2,PM4	1
MYH7	c.4954G>T	p.D1652Y	missense	1.2e-05	VUS	PM2,PP3	1
MYH7	c.5075T>A	p.V1692E	missense	0	VUS	PM2	1
MYH7	c.508G>A	p.E170K	missense	0	Likely Pathogenic *	PM2,PP3,PM1(s)	2
MYH7	c.5134C>T	p.R1712W	missense	0	VUS	PM2,PP1(p),PP3	2	PMID:15483641,24498601
MYH7	c.5135G>A	p.R1712Q	missense	0	Likely Pathogenic	PM2,PS4,PP3	2
MYH7	c.5334C>A	p.H1778Q	missense	0	VUS	PM2,PP3	1
MYH7	c.5341C>T	p.R1781C	missense	0	VUS	PM2,PP3	1
MYH7	c.5380C>A	p.Q1794K	missense	0	VUS	PM2,PP3	1
MYH7	c.5470A>G	p.N1824D	missense	0	VUS	PM2	1
MYH7	c.5471A>G	p.N1824S	missense	1.2e-05	VUS	PM2	1
MYH7	c.5507C>T	p.S1836L	missense	2.9e-05	VUS	PM2,PP3	1
MYH7	c.5749G>T	p.V1917F	missense	0	VUS	PM2,PP3	1
MYH7	c.5769delG	-	frameshift	0	Likely Pathogenic	PM2,PS4	1
MYH7	c.5779A>T	p.I1927F	missense	3e-05	VUS	PM2	1
MYH7	c.5786C>T	p.T1929M	missense	1.2e-05	VUS	PM2	1
MYH7	c.788T>C	p.I263T	missense	0	Pathogenic	PM2,PP1(s),PP3,PM1(s)	1	PMID:15008060
MYH7	c.976G>C	p.A326P	missense	3.9e-05	Likely Pathogenic *	PM2,PP3,PM1(s)	1
MYL2	c.221C>T	p.P74L	missense	0	VUS	PM2,PM1(p)	1
MYL2	c.428C>T	p.P143L	missense	1.2e-05	VUS	PM2,PP3,PM1(p)	1
MYL3	c.383G>A	p.G128D	missense	0	VUS	PM2	1
MYL3	c.445A>G	p.M149V	missense	0	Likely Pathogenic	PM2,PP1(s),PM1(m)	1	PMID:8673105,16267253
MYL3	c.460C>T	p.R154C	missense	0	VUS	PM2,PP3,PM1(m)	1
PLN	c.116T>G	p.L39X	nonsense	0	Pathogenic	PM2,PVS1,PS4	1
PLN	c.74G>A	p.R25H	missense	0	VUS	PM2,PP3,PM1(p)	1
TNNI3	c.407G>A	p.R136Q	missense	0	VUS	PM2	1
TNNI3	c.433C>T	p.R145W	missense	0	Pathogenic	PM2,PS4,PP1(p),PP3,PM5,PM1(s)	3	PMID:15607392
TNNI3	c.484C>T	p.R162W	missense	1.2e-05	Pathogenic	PM2,PS4,PM5,PM1(s)	2
TNNI3	c.485G>A	p.R162Q	missense	5e-06	Pathogenic	PM2,PS4,PP1(m),PM1(s)	4	PMID:15607392,22876777
TNNI3	c.557G>A	p.R186Q	missense	0	Pathogenic	PM2,PP1(s),PM1(s)	1	PMID:15607392,23540544,26169204
TNNI3	c.561G>T	p.E187D	missense	0	Likely Pathogenic *	PM2,PM1(s)	1
TNNI3	c.587A>G	p.D196G	missense	0	Likely Pathogenic *	PM2,PP3,PM1(s)	1
TNNI3	c.602T>C	p.M201T	missense	0	Likely Pathogenic *	PM2,PP3,PM1(s)	1
TNNI3	c.608G>T	p.G203V	missense	0	Likely Pathogenic *	PM2,PP3,PM1(s)	1
TNNT2	c.236T>A	p.I79N	missense	0	Pathogenic	PM2,PS4,PP1(s),PP3,PM1(s)	2	PMID:7898523,18651846
TNNT2	c.274C>T	p.R92W	missense	0	Pathogenic	PM2,PS4,PP1(m),PP3,PM5,PM1(s)	2	PMID:11346248,9060892
TNNT2	c.275G>A	p.R92Q	missense	0	Pathogenic	PM2,PM6,PP1(s),PP3,PM5,PM1(s)	1	PMID:8205619,7898523
TNNT2	c.664G>T	p.D222Y	missense	0	VUS	PM2,PP3	1
TNNT2	c.785A>G	p.N262S	missense	0	VUS	PM2	2
TPM1	c.62G>T	p.R21L	missense	0	Likely Pathogenic *	PM2,PP3,PM1(s)	2
TPM1	c.842T>C	p.M281T	missense	0	Likely Pathogenic *	PM2,PM1(s)	2
Table S6: List of variants in valid HCM genes detected in the prospective HCM cohort of 684 cases. Only variants that activate the PM2 rule (i.e. an ExAC filtering allele frequency < 4x10-5) are displayed. The ACMG/AMP rules activated for each variant are shown, along with the strength of evidence where this is variable (p = supporting, m = moderate, s = strong) and the source for curated evidenc…

## Sheet: Table S7
Gene	Hotspot	Freq Cases (variants/total)	Freq ExAC (variants/total)	p-value	OR (95% CI)	EF (95% CI)
Entire gene	-	17.58% (211/1200)	1.81% (970/53486)	<0.0001	11.6 (9.8-13.6)	0.913 (0.899-0.928)
CPVT clusters	41-exon hotspot	14.92% (179/1200)	0.60% (319/53486)	<0.0001	29.2 (24.1-35.4)	0.966 (0.959-0.973)
Rest of gene	41-exon hotspot	2.67% (32/1200)	1.22% (651/53486)	<0.0001	2.2 (1.6-3.2)	0.550 (0.392-0.709)
CPVT clusters	21-exon hotspot	12.67% (152/1200)	0.36% (194/53486)	<0.0001	39.8 (31.9-49.7)	0.975 (0.969-0.981)
Rest of gene	21-exon hotspot	4.92% (59/1200)	1.45% (776/53486)	<0.0001	3.5 (2.7-4.6)	0.715 (0.640-0.791)
CPVT clusters	Clustering algorithm	11.67% (140/1200)	0.24% (127/53486)	<0.0001	55.5 (43.3-71.1)	0.982 (0.977-0.987)
Rest of gene	Clustering algorithm	5.92% (71/1200)	1.58% (843/53486)	<0.0001	3.9 (3.1-5.0)	0.745 (0.683-0.808)
Table S7: Comparison of three approaches to identify CPVT-enriched hotspots in RYR2 with calculated EF and OR values within and outside of clusters. The original 41-exon hotspot included exons 3-15, 44-50, 83-90 and 93-105. The recently refined hotspot by Kapplinger et al identified 21 exons with enrichment in cases over controls (3, 8, 14, 43, 47-49, 81, 83, 88-90, 93, 95, 97-101, 103, 105). The…
